# Supplementary material for: Systematic improvements in lentiviral transduction of primary human natural killer cells undergoing ex vivo expansion
Source: PubMed Central journal article supplement (PMC7890427; doi:10.1016/j.omtm.2021.01.008), 2021-01-20
Supplement: mmc1.pdf [file mmc1.pdf]

OMTM, Volume 20

## Supplemental Information

**Systematic improvements in lentiviral  
transduction of primary human natural  
killer cells undergoing *ex vivo* expansion**

**David S.J. Allan, Mala Chakraborty, Giacomo C. Waller, Michael J. Hochman, Akkapon Poolcharoen, Robert N. Reger, and Richard W. Childs**

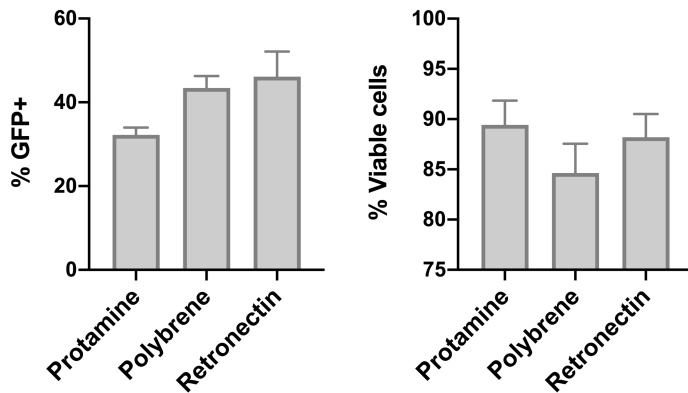

**Figure S1. Effects of enhancers on transduction of primary human NK cells with lentiviral vectors.** NK cells from PBMC were stimulated with 500 U/mL IL-2 (or IL-2 and 10-50 ng/mL IL-15) for 3-4 days then transduced with pLV-PGK-GFP in the presence of either protamine sulfate (10  $\mu$ g/mL), polybrene (8  $\mu$ g/mL), or using retrofectin-coated plates known to enhance retroviral transduction. Several days later, NK cells were queried for the percentage of GFP<sup>+</sup> cells and viable cells by flow cytometry. Mean and SEM of experiments from 5 donors are shown. One-way ANOVA p values were > 0.05.

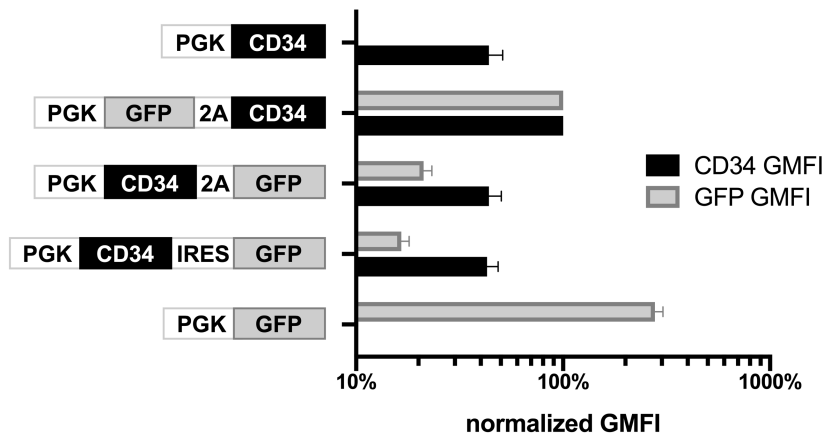

**Figure S2. Arrangement of insert sequences within the lentiviral vector affects transduction efficiency in human NK cells.** Further data from experiment depicted in Figure 3A. Geometric mean fluorescent intensity of gated CD34<sup>+</sup> or GFP<sup>+</sup> populations are shown, normalized in each experiment to the result obtained with pLV-PGK-GFP-2A-CD34 vector. Antilog of mean and SEM of log<sub>10</sub> transformed values are shown.

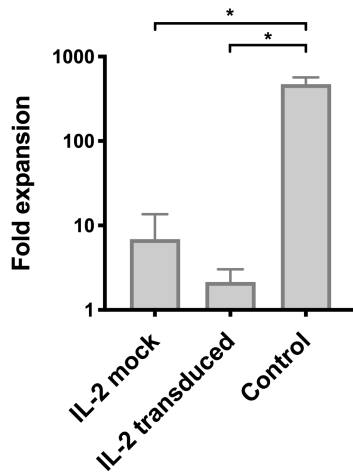

**Figure S3. Primary human NK cells pre-stimulated with IL-2 lose the ability to proliferate efficiently upon subsequent exposure to irradiated LCL feeder cells.** NK cells from PBMC were stimulated with IL-2 for 3-5 days, then subjected to (i) mock transduction without virus or (ii) transduction with pLV-EFS-GFP-2A-CD34 viral particles. After 2-3 additional days, irradiated LCL feeder cells were added to both conditions (i and ii). Control cultures of NK cells which received irradiated LCL feeders at the start of culture are shown for comparison. Overall proliferation of NK cells at day 19 of culture is depicted (antilog of mean and SEM of  $\log_{10}$  transformed values of 3 experiments from 2 blood donors). \*  $p < 0.05$  by Tukey's multiple comparisons test after one-way ANOVA of  $\log_{10}$  transformed values.

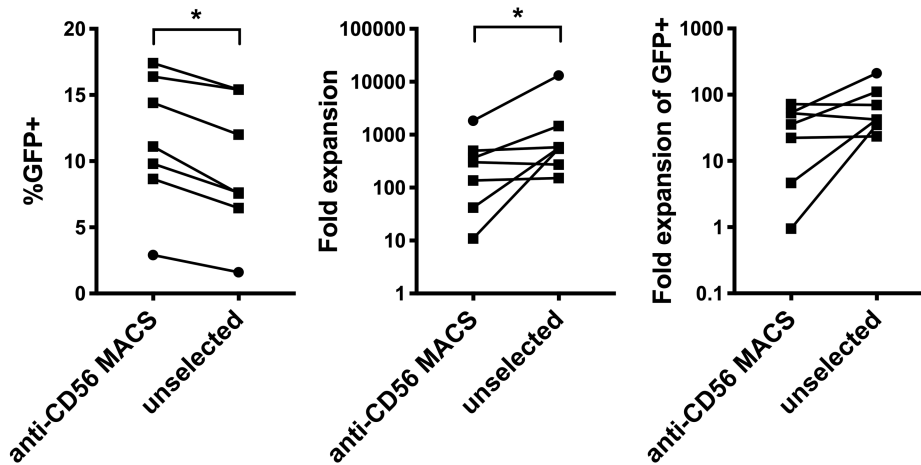

**Figure S4. Magnetic bead separation of NK cells from irradiated LCLs before transduction does not improve yields of transduced NK cells.** Peripheral blood NK cells were stimulated with irradiated LCL and IL-2 for 2-7 days, then selected with anti-CD56 MACS beads to isolate NK cells from remaining LCL and debris, or left unselected. Cells were then transduced with pLV-EFS-GFP-2A-CD34 (squares) or pLV-EFS-GFP-2A-CD4 (circles) viral particles. Three days later, LCL feeders were again added and NK cells cultured until day 21 from the start of the experiment. Percentages of cells expressing GFP were determined by flow cytometry. Fold expansion of total NK cell numbers or GFP<sup>+</sup> NK cell numbers from the start of culture are shown. Results of 7 independent experiments from 2 blood donors are depicted. \*  $p < 0.05$  by paired T test (of  $\log_{10}$  transformed values for fold expansions).

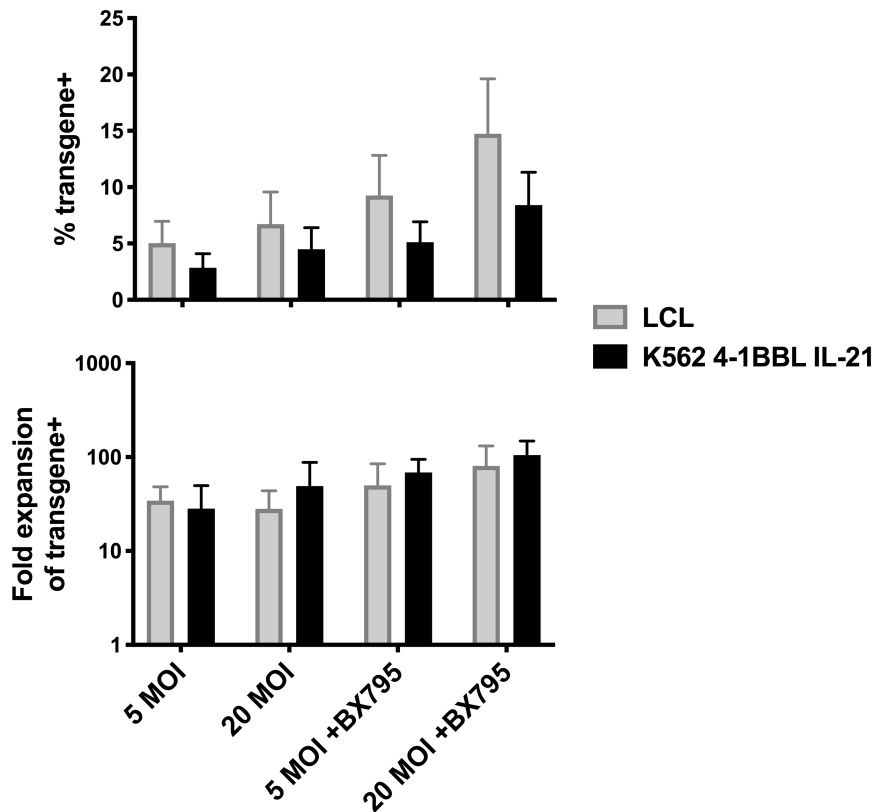

**Figure S5. Effects of feeder cell type on NK cell transduction.** Peripheral blood NK cells were stimulated with IL-2 and either LCL (10:1 ratio) or K562 4-1BBL IL-21 (2:1 ratio). After 4-5 days, cells were transduced with pLV-CD34-2A-CXCR4 at the indicated MOI with or without 1.5  $\mu$ M BX795. 2-3 days later, feeder cells were added again. Mean and SEM percentages of cells expressing the CD34 transgene were determined by flow cytometry. Fold expansion of transgene<sup>+</sup> (CD34<sup>+</sup>) NK cell numbers from the start of culture to day 14 are shown (antilog of mean and SEM of  $\log_{10}$  transformed values). Results from 3 blood donors are depicted. In a three-way ANOVA of  $\log_{10}$ (fold expansion of transgene<sup>+</sup> cells) both the feeder variety and presence of BX795 were  $p < 0.05$ . No factor was significant in an ANOVA of transgene%. pLV-CD34-2A-CXCR4 viral particles were generated with 3rd generation lentiviral packaging plasmids.

**Table S1. Lentiviral vectors**

| <b>Name</b>           | <b>Vector Backbone</b> | <b>Insert</b>                     | <b>Internal promoter</b>                                                              | <b>Promoter size (b.p.)</b> | <b>Viral genome size</b> |
|-----------------------|------------------------|-----------------------------------|---------------------------------------------------------------------------------------|-----------------------------|--------------------------|
| pLV-PGK-GFP           | pLV[Exp]               | EGFP                              | Mouse phosphoglycerate kinase 1 (PGK)                                                 | 511                         | 3942                     |
| pLV-CMV-GFP           | pLV[Exp]               | EGFP                              | Human cytomegalovirus (CMV) immediate/early                                           | 589                         | 4020                     |
| pLV-EF1A-GFP          | pLV[Exp]               | EGFP                              | Human eukaryotic translation elongation factor 1 $\alpha$ 1 (EF1A)                    | 1179                        | 4610                     |
| pLV-EFS-GFP           | pLV[Exp]               | EGFP                              | Human EF1A short form (EFS)                                                           | 232                         | 3663                     |
| pLV-CAG-GFP           | pLV[Exp]               | EGFP                              | CMV early enhancer fused to modified chicken $\beta$ -actin promoter (CAG)            | 1733                        | 5164                     |
| pLV-CBh-GFP           | pLV[Exp]               | EGFP                              | CMV early enhancer fused to modified chicken $\beta$ -actin promoter short form (CBh) | 798                         | 4229                     |
| pLV-SV40-GFP          | pLV[Exp]               | EGFP                              | Simian virus 40 enhancer/early (SV40)                                                 | 344                         | 3775                     |
| pLV-UBC-GFP           | pLV[Exp]               | EGFP                              | Human ubiquitin C (UBC)                                                               | 1178                        | 4609                     |
| pLV-PGK-CD34          | pLV[Exp]               | truncated human CD34 (tCD34)      | PGK                                                                                   | 511                         | 4173                     |
| pLV-PGK-CD34-IRES-GFP | pLV[Exp]               | tCD34; IRES; EGFP                 | PGK                                                                                   | 511                         | 5487                     |
| pLV-PGK-CD34-2A-GFP   | pLV[Exp]               | tCD34; P2A linker; EGFP           | PGK                                                                                   | 511                         | 4956                     |
| pLV-PGK-GFP-2A-CD34   | pLV[Exp]               | EGFP; P2A; tCD34                  | PGK                                                                                   | 511                         | 4956                     |
| pLV-EFS-GFP-2A-CD34   | pLV[Exp]               | EGFP; P2A; codon optimized tCD34  | EFS                                                                                   | 232                         | 4677                     |
| pLV-EFS-GFP-2A-CD4    | pLV[Exp]               | EGFP; P2A; truncated human CD4    | EFS                                                                                   | 232                         | 5001                     |
| pLV-EFS-GFP-2A-CD19   | pLV[Exp]               | EGFP; P2A; truncated human CD19   | EFS                                                                                   | 232                         | 4728                     |
| pLV-EFS-CD34-2A-CXCR4 | pLV[Exp]               | tCD34; P2A; truncated human CXCR4 | EFS                                                                                   | 232                         | 4959                     |
